# Supplementary material for: First Insights into Genetic Diversity of Indonesian Typhonium flagelliforme Using Transcriptome-Based EST- SSR Markers
Source: Research Square preprint supplement (doi:10.21203/rs.3.rs-7790550/v1), 2025-10-29
Supplement: Supplementary file 1 [file 1969e8bb292c7cb1b0a4af53.docx]

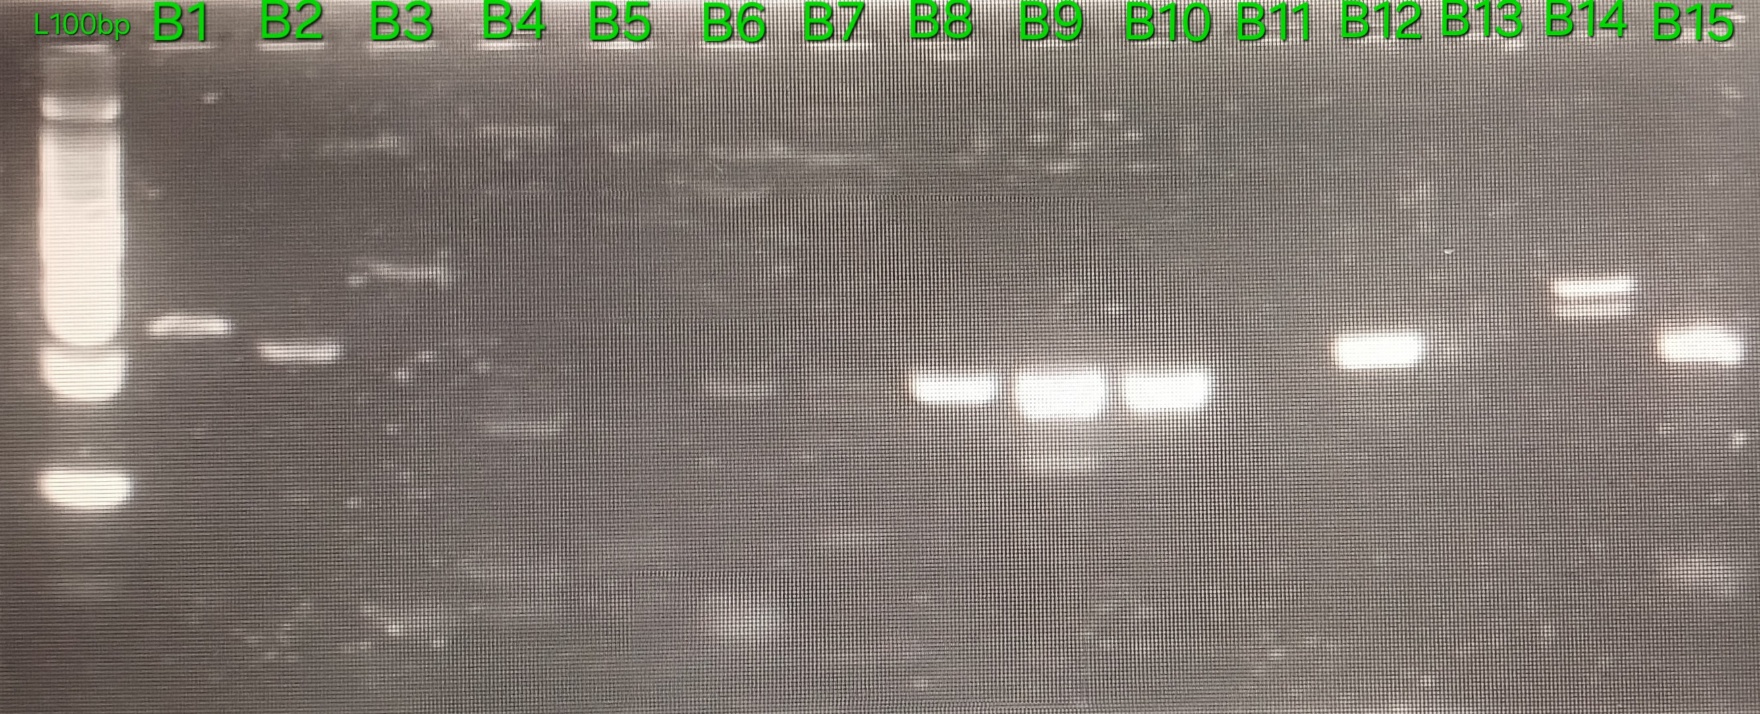

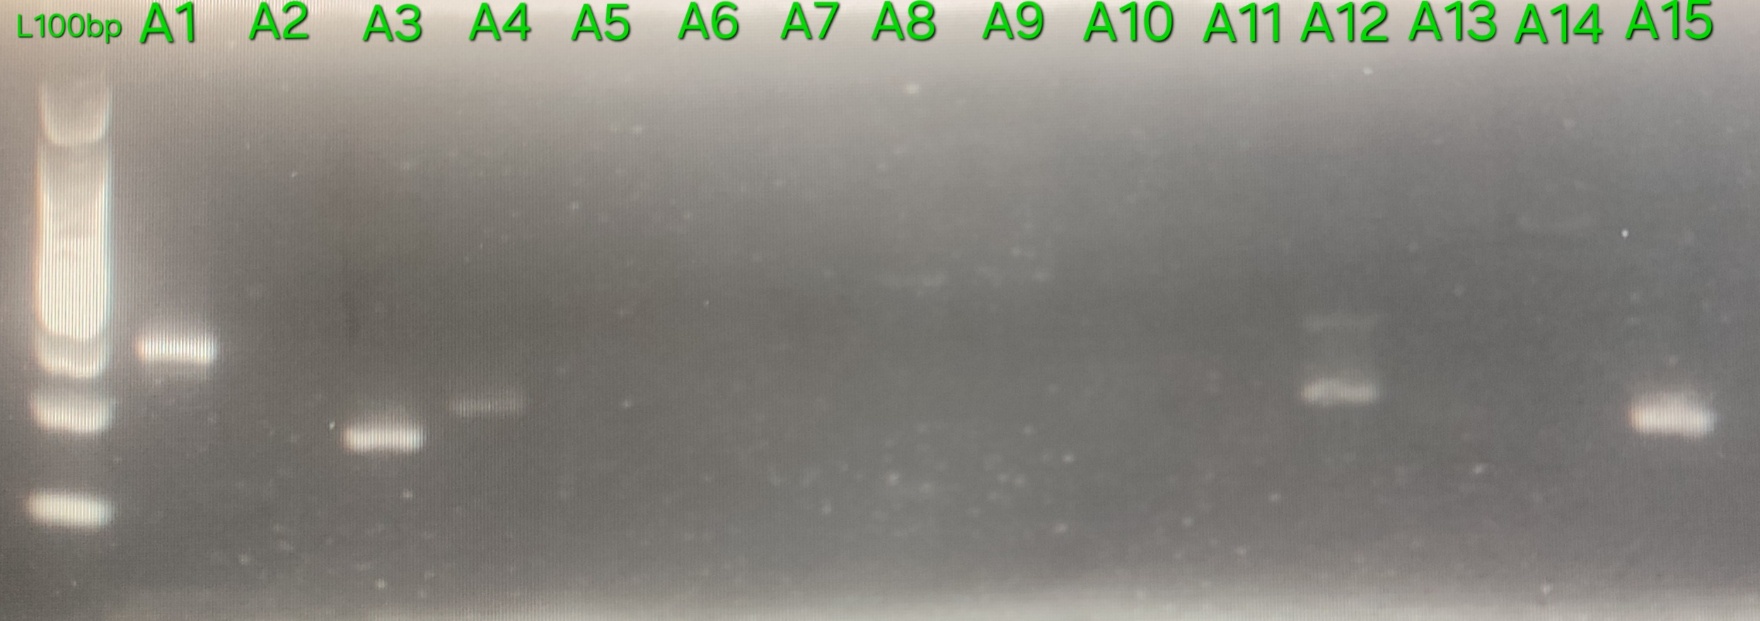


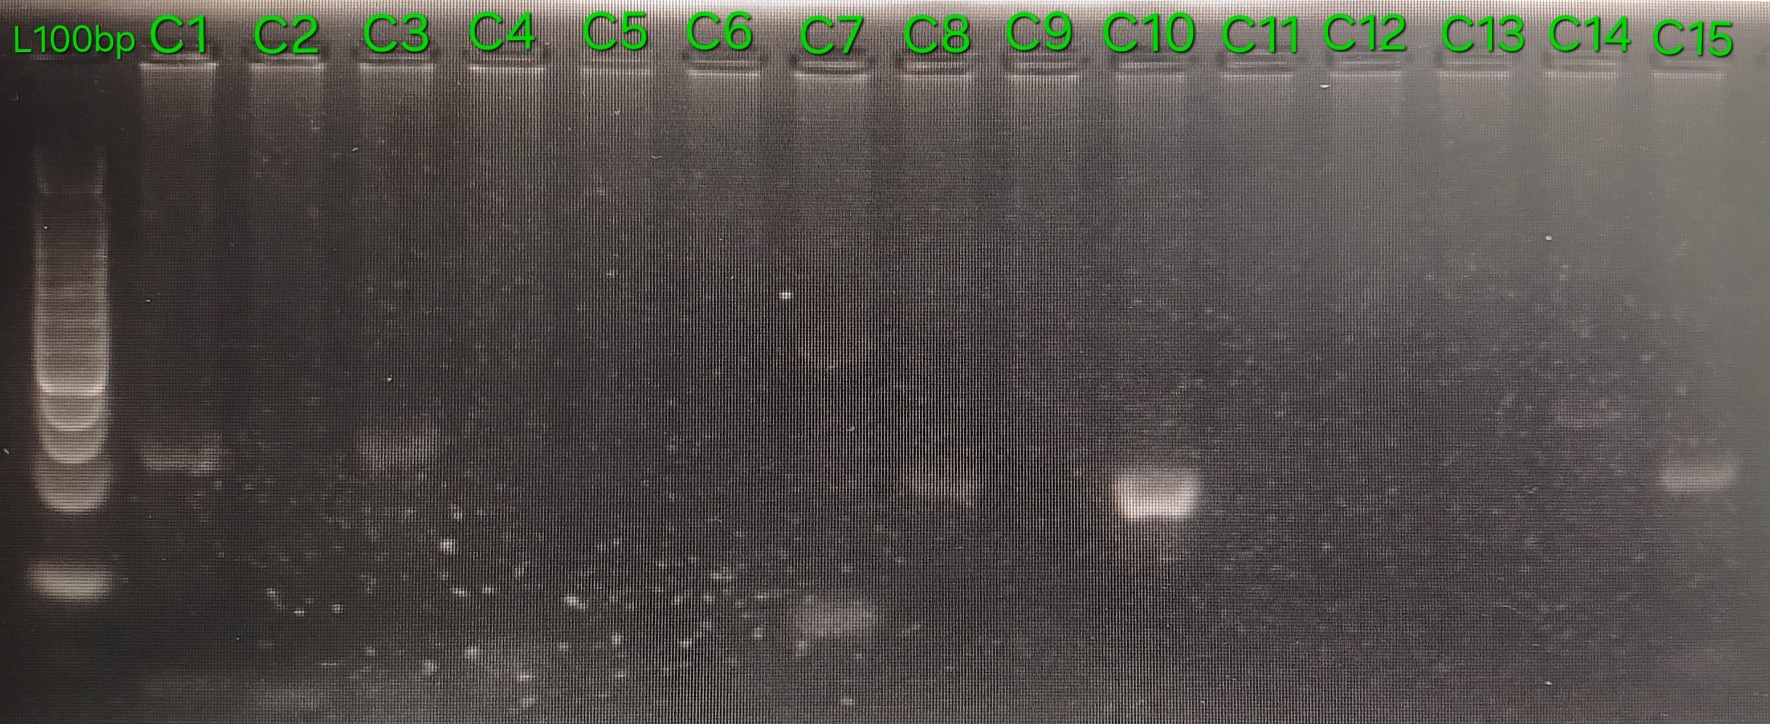


**Supplementary Fig. 1 Cross-Transferability of SSR Markers Profiles in *Alocasia cucullata* (A), *Xanthosoma undipes* (B), and *Metroxylon sagu* (C). (L100bp= 100 bp DNA ladder; 1-15=EST-SSR markers)**
