# Supplementary material for: First Insights into Genetic Diversity of Indonesian Typhonium flagelliforme Using Transcriptome-Based EST- SSR Markers
Source: Research Square preprint supplement (doi:10.21203/rs.3.rs-7790550/v1), 2025-10-29
Supplement: Supplementary file 2 [file 92efcf0b3071a65969aef8a8.docx]

**Supplementary Table 1 List of *T. flagelliforme* accessions used for molecular diversity studies**

| Accession Code | District | Province | Country | Elevation (m) |
| --- | --- | --- | --- | --- |
| S1 | Timbangan-Ogan Ilir | South Sumatra | Indonesia | 8 |
| S2 | Serpong | Banten | Inodensia | 30 |
| S3 | Rumpin-Bogor | West Java | Indonesia | 86 |
| S4 | Kebun Raya Bogor | West Java | Indonesia | 260 |
| S5 | Cikarawang-Bogor | West Java | Indonesia | 193 |
| S6 | Cikabayan-Bogor | West Java | Indonesia | 240 |
| S7 | Dramaga-Bogor | West Java | Indonesia | 244 |
| S8 | Mlatibaru-Semarang | Central Java | Indonesia | 2 |
| S9 | BPTO-Karang Anyar | Central Java | Indonesia | 185 |
| S10 | Matesih-Karang Anyar | Central Java | Indonesia | 450 |
| S11 | Yogyakarta | Central Java | Indonesia | 75 |
| S12 | Tanggul Angin-Sidoarjo | East Java | Indonesia | 25 |
| S13 | Tanjung Bungkak-Denpasar | Bali | Indonesia | 4 |
| S14 | Sungai samboja | East Borneo | Indonesia | 14 |
